# Supplementary material for: Application of NeuroTrace staining in the fresh frozen brain samples to laser microdissection combined with quantitative RT-PCR analysis
Source: PubMed Central journal article supplement (PMC4473849; doi:10.1186/s13104-015-1222-9), 2015-06-20

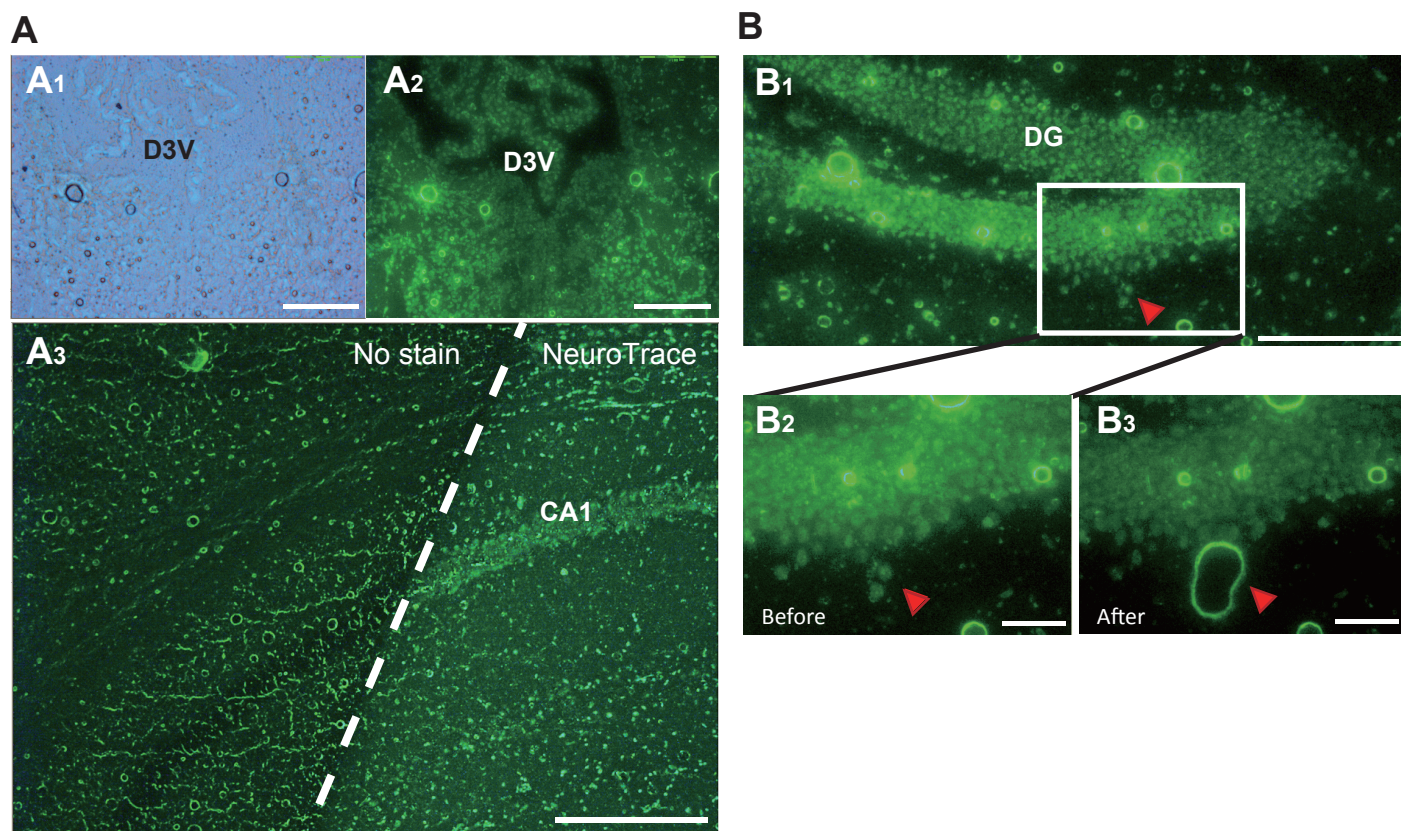

Supplement: 13104_2015_1222_MOESM1_ESM.pdf [file 13104_2015_1222_MOESM1_ESM.pdf]
